# Supplementary material for: High-temperature reversible phase transitions and exceptional dielectric anomalies in cobalt(ii) based ionic crystals: [Me3NCH2X]2[CoX4] (X = Cl and Br)
Source: Royal Society of Chemistry journal article supplement (doi:10.1039/c8dt00786a), 2018-01-01
Supplement: c8dt00786a1.pdf [file c8dt00786a1.pdf]

## Supporting information

### High-temperature reversible phase transitions and exceptional dielectric anomalies in cobalt (II) based ionic crystals: $[\text{Me}_3\text{NCH}_2\text{X}]_2[\text{CoX}_4]$ ( $\text{X} = \text{Cl}$ and $\text{Br}$ )

Xiu-Ni Hua, Chao-Ran Huang, Ji-Xing Gao, Yang Lu, Xiao-Gang Chen  
and Wei-Qiang Liao\*

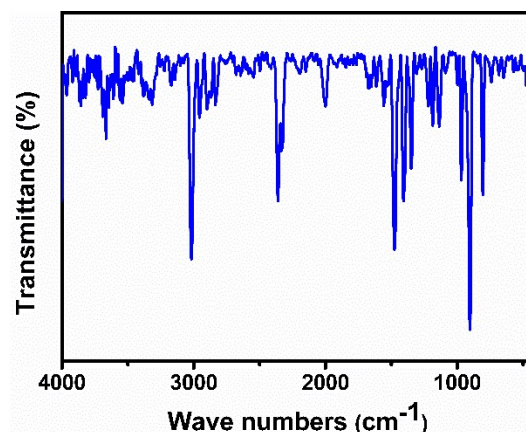

**Fig. S1** Infrared (IR) spectra of solid compound **1** in KBr pellet was recorded on a Shimadzu model IR-60 spectrometer at room temperature.

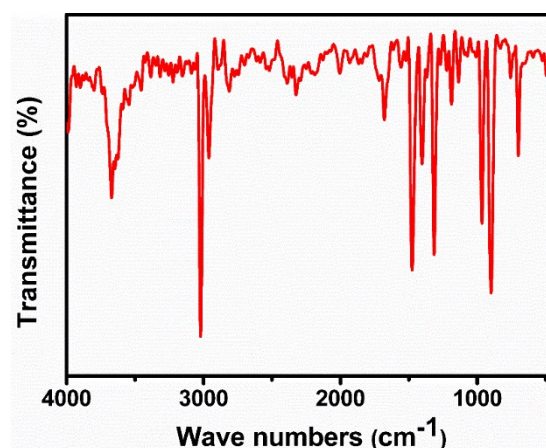

**Fig. S2** Infrared (IR) spectra of solid compound **2** in KBr pellet was recorded on a Shimadzu model IR-60 spectrometer at room temperature.

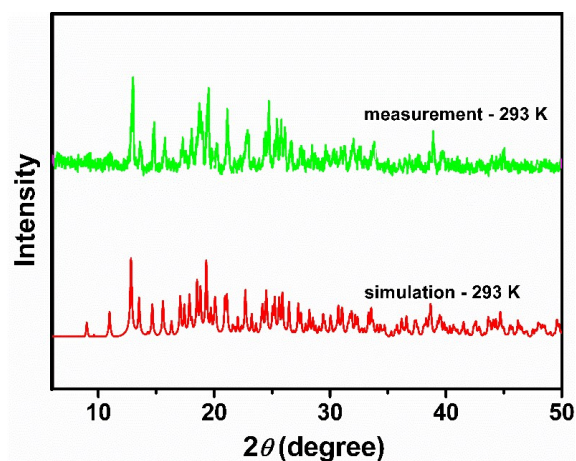

**Fig. S3** PXRd patterns of **1** measured at 293 K matching very well with the simulated ones.

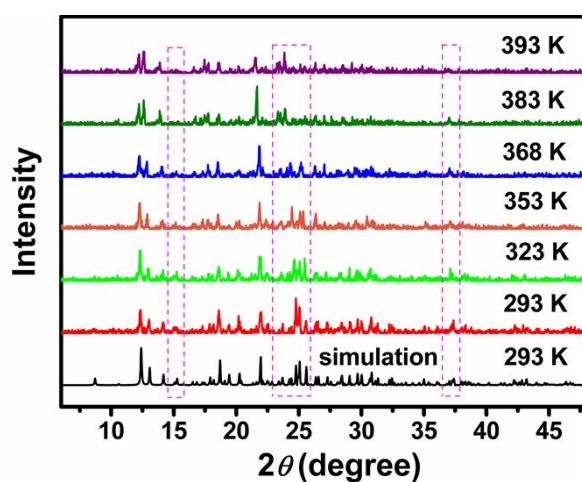

**Fig. S4** Variable-temperature PXRd patterns of **2** measured in the heating mode. The PXRd patterns measured at 293 K matching very well with the simulated ones.

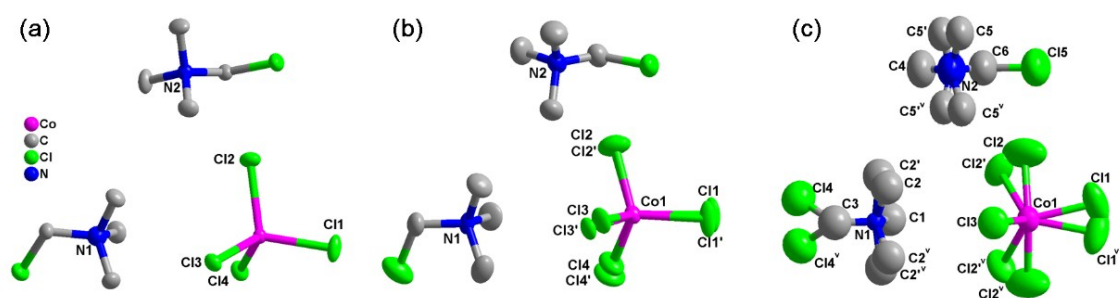

**Fig. S5** Thermal ellipsoidal view of **1** at (a) 223 K, (b) at 293 K and (c) 353 K. Hydrogen atoms bonded to the C atoms are omitted for clarity. Thermal ellipsoids for the atoms are shown at 30% probability level.

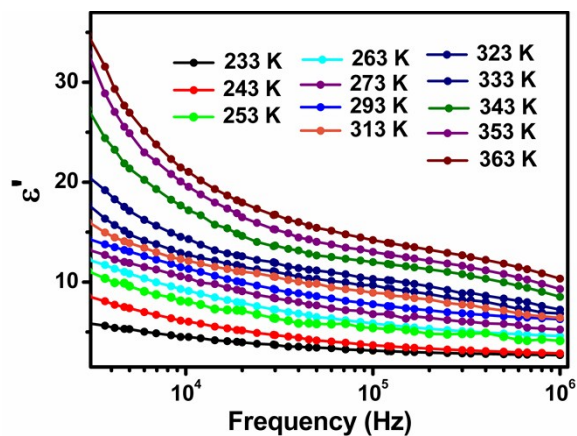

**Fig. S6** Frequency dependence of the dielectric constant ( $\epsilon'$ ) of **1** obtained at selected temperatures.

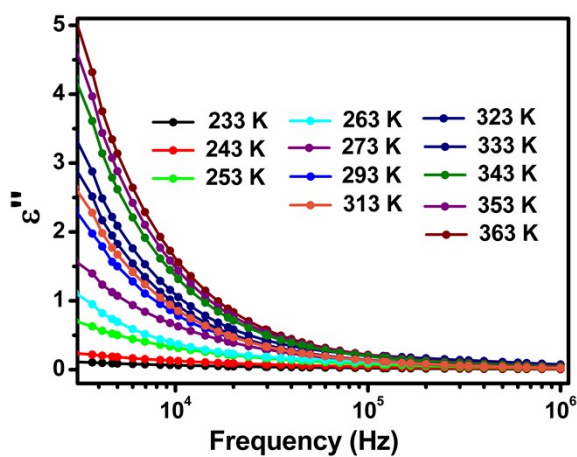

**Fig. S7** Frequency dependence of the dielectric constant ( $\epsilon''$ ) of **1** obtained at selected temperatures.

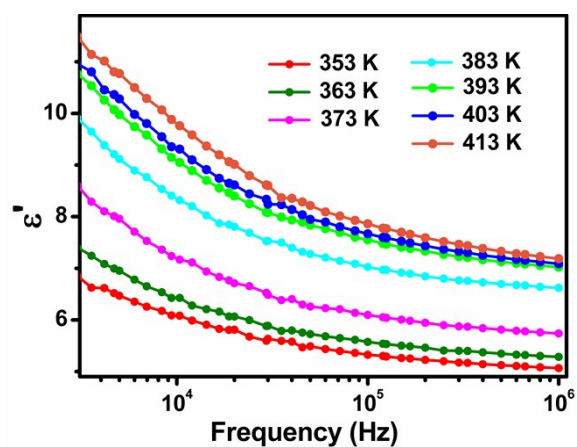

**Fig. S8** Frequency dependence of the dielectric constant ( $\epsilon'$ ) of **2** obtained at selected temperatures.

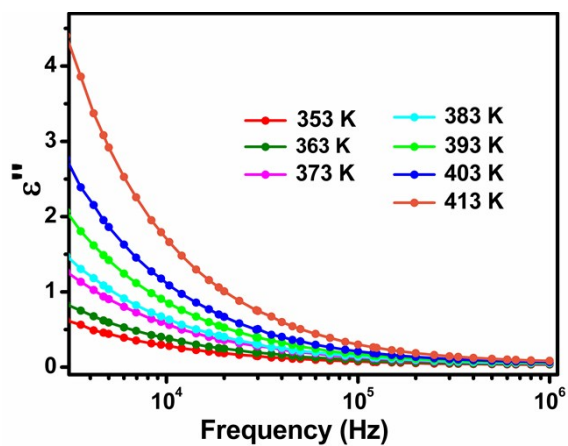

**Fig. S9** Frequency dependence of the dielectric constant ( $\epsilon''$ ) of **2** obtained at selected temperatures.

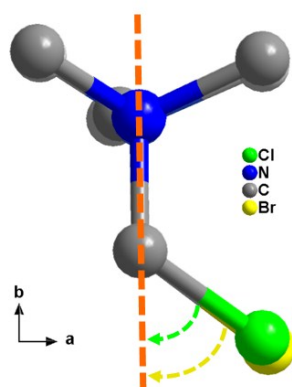

**Fig. S10** The cations in **1** and **2** at RTP.

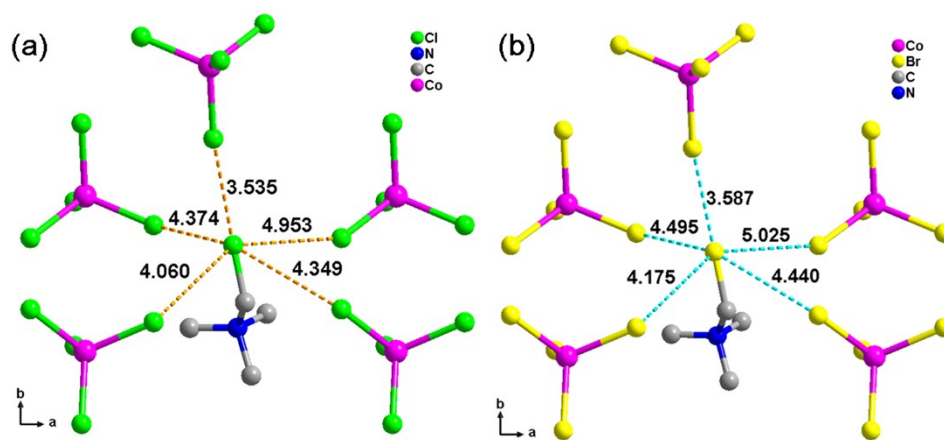

**Fig. S11** The C-X...X interaction of (a) **1** (X=Cl). (b) **2** (X=Br).

**Table S1** Crystal Data and Structure Refinement Details for **1** and **2**.

|                          | [Me <sub>3</sub> NCH <sub>2</sub> Cl] <sub>2</sub> [CoCl <sub>4</sub> ] |                                    | [Me <sub>3</sub> NCH <sub>2</sub> Br] <sub>2</sub> [CoBr <sub>4</sub> ] |                                    |
|--------------------------|-------------------------------------------------------------------------|------------------------------------|-------------------------------------------------------------------------|------------------------------------|
| <i>T</i> (K)             | 223 K                                                                   | 293 K                              | 353 K                                                                   | 293 K                              |
| Formula                  | 417.91                                                                  | 417.91                             | 417.91                                                                  | 684.61                             |
| Crystal system           | orthorhombic                                                            | monoclinic                         | orthorhombic                                                            | monoclinic                         |
| Space group              | <i>P</i> 2 <sub>1</sub> 2 <sub>1</sub> 2 <sub>1</sub>                   | <i>P</i> 2 <sub>1</sub> / <i>c</i> | <i>Pnma</i>                                                             | <i>P</i> 2 <sub>1</sub> / <i>c</i> |
| <i>a</i> /Å              | 8.979(4)                                                                | 9.199(7)                           | 12.156(13)                                                              | 9.4935(8)                          |
| <i>b</i> /Å              | 12.077(5)                                                               | 16.828(14)                         | 9.164(10)                                                               | 17.3888(13)                        |
| <i>c</i> /Å              | 16.673(7)                                                               | 12.10(1)                           | 16.939(19)                                                              | 12.4983(8)                         |
| <i>β</i> (deg)           | 90                                                                      | 93.47(2)                           | 90                                                                      | 93.438(7)                          |
| <i>V</i> /Å <sup>3</sup> | 1808(13)                                                                | 1870(3)                            | 1887(4)                                                                 | 2059.5(3)                          |
| <i>Z</i>                 | 4                                                                       | 4                                  | 4                                                                       | 4                                  |
| <i>F</i> (000)           | 852                                                                     | 852                                | 852                                                                     | 1284                               |
| Collected reflections    | 13385                                                                   | 11508                              | 11575                                                                   | 12747                              |
| Unique reflections       | 4125                                                                    | 3382                               | 1876                                                                    | 3733                               |
| Parameters refined       | 162                                                                     | 193                                | 128                                                                     | 161                                |
| GOF                      | 1.028                                                                   | 1.045                              | 1.023                                                                   | 1.007                              |
| <i>R</i> <sub>1</sub>    | 0.050                                                                   | 0.099                              | 0.137                                                                   | 0.113                              |
| <i>wR</i> <sub>2</sub>   | 0.115                                                                   | 0.217                              | 0.258                                                                   | 0.311                              |

**Table S2** Selected bond lengths [Å] and angles [°] for **1** at 223 K, 293 K and 353 K.

|       |               |           |              |            |
|-------|---------------|-----------|--------------|------------|
| 223 K | Co1-Cl3       | 2.271(2)  | Co1-Cl2      | 2.2692(19) |
|       | Co1-Cl1       | 2.27(19)  | Co1-Cl4      | 2.2792(18) |
|       | C4-Cl5        | 1.76(7)   | C8-Cl6       | 1.752(7)   |
|       | Cl2-Co1-Cl3   | 110.26(8) | Cl2-Co1-Cl1  | 110.69(8)  |
|       | Cl3-Co1-Cl1   | 107.17(9) | Cl2-Co1-Cl4  | 107.52(7)  |
|       | Cl3-Co1-Cl4   | 108.62(8) | Cl1-Co1-Cl4  | 112.57(8)  |
|       | N1-C4-Cl5     | 112.3(4)  | N2-C8-Cl6    | 113.0(5)   |
| 293 K | Co1-Cl4       | 2.19(2)   | Co1-Cl2      | 2.208(19)  |
|       | Co1-Cl1'      | 2.25(3)   | Co1-Cl3      | 2.29(2)    |
|       | Co1-Cl3'      | 2.28(2)   | Co1-Cl1      | 2.30(2)    |
|       | Co1-Cl4'      | 2.34(2)   | Co1-Cl2'     | 2.363(19)  |
|       | Cl5-C4        | 1.762(18) | Cl6-C8       | 1.747(17)  |
|       | Cl4-Co1-Cl1'  | 119.2(11) | Cl4-Co1-Cl3  | 110.2(10)  |
|       | Cl2-Co1-Cl1'  | 102.0(16) | Cl2-Co1-Cl3  | 112.9(7)   |
|       | Cl2-Co1-Cl3'  | 121.8(7)  | Cl1'-Co1-Cl3 | 107.7(15)  |
|       | Cl1'-Co1-Cl3' | 109.8(14) | Cl4-Co1-Cl1  | 108.8(8)   |
|       | Cl2-Co1-Cl4'  | 108.8(8)  | Cl2-Co1-Cl1  | 109.4(11)  |
|       | Cl3-Co1-Cl4'  | 114.8(10) | Cl3-Co1-Cl1  | 110.7(14)  |

|       |                                        |           |                           |           |
|-------|----------------------------------------|-----------|---------------------------|-----------|
| 353 K | Cl1'-Co1-Cl4'                          | 109.9(9)  | Cl3'-Co1-Cl1              | 110.6(14) |
|       | Cl3'-Co1-Cl4'                          | 104.3(8)  | Cl4-Co1-Cl2               | 104.7(12) |
|       | Cl4-Co1-Cl2'                           | 109.2(9)  | Cl4'-Co1-Cl2'             | 114.5(11) |
|       | Cl1-Co1-Cl2'                           | 114.6(14) | Cl1'-Co1-Cl2'             | 106.1(10) |
|       | Cl3'-Co1-Cl2'                          | 112.3(7)  | Cl3-Co1-Cl2'              | 103.3(7)  |
|       | N1-C4-Cl5                              | 112.7(12) | N2-C8-Cl6                 | 112.6(11) |
|       | Co1-Cl1 <sup>i</sup>                   | 2.207(11) | Co1-Cl2 <sup>i</sup>      | 2.209(12) |
|       | Co1-Cl1                                | 2.207(11) | Co1-Cl2'                  | 2.209(12) |
|       | Co1-Cl2 <sup>i</sup>                   | 2.25(2)   | Co1-Cl2                   | 2.25(2)   |
|       | Co1-Cl3                                | 2.258(7)  | C6-Cl5                    | 1.75(3)   |
|       | C3-Cl4                                 | 1.65(3)   | C3-Cl4 <sup>ii</sup>      | 1.65(3)   |
|       | Cl1 <sup>i</sup> -Co1-Cl2 <sup>i</sup> | 107.9(7)  | Cl1-Co1-Cl2 <sup>i</sup>  | 105.3(9)  |
|       | Cl1-Co1-Cl2 <sup>i</sup>               | 126.8(6)  | Cl2'-Co1-Cl2 <sup>i</sup> | 112.7(8)  |
|       | Cl1 <sup>i</sup> -Co1-Cl2'             | 126.8(6)  | Cl3-Co1-Cl2 <sup>i</sup>  | 109.3(6)  |
|       | Cl1-Co1-Cl2'                           | 107.9(7)  | Cl1 <sup>i</sup> -Co1-Cl2 | 105.3(9)  |
|       | Cl1 <sup>i</sup> -Co1-Cl3              | 113.4(4)  | Cl2 <sup>i</sup> -Co1-Cl2 | 112.7(8)  |
|       | Cl1-Co1-Cl3                            | 113.4(4)  | Cl3-Co1-Cl2               | 109.3(6)  |
|       | Cl2 <sup>i</sup> -Co1-Cl3              | 108.3(4)  | Cl2'-Co1-Cl3              | 108.3(4)  |
|       | N1-C3-Cl4                              | 130(3)    | N1-C3-Cl4 <sup>ii</sup>   | 13(3)     |
|       | N2-C6-Cl5                              | 125(4)    |                           |           |

Symmetry codes: (i) x, -y+3/2, z; (ii) x, -y+1/2, z.

**Table S3** Selected bond lengths [Å] and angles [°] for **2** at 293 K.

|      |             |            |             |            |
|------|-------------|------------|-------------|------------|
| 293K | Co1-Br2     | 2.403(3)   | Co1-Br1     | 2.405(3)   |
|      | Co1-Br3     | 2.405(3)   | Co1-Br4     | 2.412(3)   |
|      | Br5-C1      | 1.89(3)    | Br6-C5      | 1.85(2)    |
|      | Br2-Co1-Br1 | 108.98(14) | Br2-Co1-Br3 | 107.97(15) |
|      | Br1-Co1-Br3 | 109.06(13) | Br2-Co1-Br4 | 112.57(13) |
|      | Br1-Co1-Br4 | 107.15(12) | Br3-Co1-Br4 | 111.07(13) |
|      | N1-C1-Br5   | 114.2(15)  | N2-C5-Br6   | 116.7(16)  |
